# Supplementary material for: Surface engineering superparamagnetic nanoparticles for aqueous applications: design and characterization of tailored organic bilayers
Source: Royal Society of Chemistry journal article supplement (doi:10.1039/c5en00089k), 2015-09-30
Supplement: c5en00089k1.pdf [file c5en00089k1.pdf]

1 [Supporting Information]

2                   Surface Engineering Superparamagnetic  
3 Nanoparticles for Aqueous Applications: Design and  
4                   Characterization of Tailored Organic Bilayers

5                   *Wenlu Li, Carl H. Hinton, Seung Soo Lee, Jiewei Wu, and John D. Fortner\**

6                   Department of Energy, Environmental, and Chemical Engineering,

7                   Washington University in St. Louis,

8                   St. Louis, Missouri 63130, United States

9

10

11

Submitted to

12

**Environmental Science: Nano**

13

14

15

16 \*To whom correspondence should be addressed:

17 John D. Fortner: Tel: +1-314-935-9293; Fax: +1-314-935-5464; Email: [jfortner@wustl.edu](mailto:jfortner@wustl.edu)

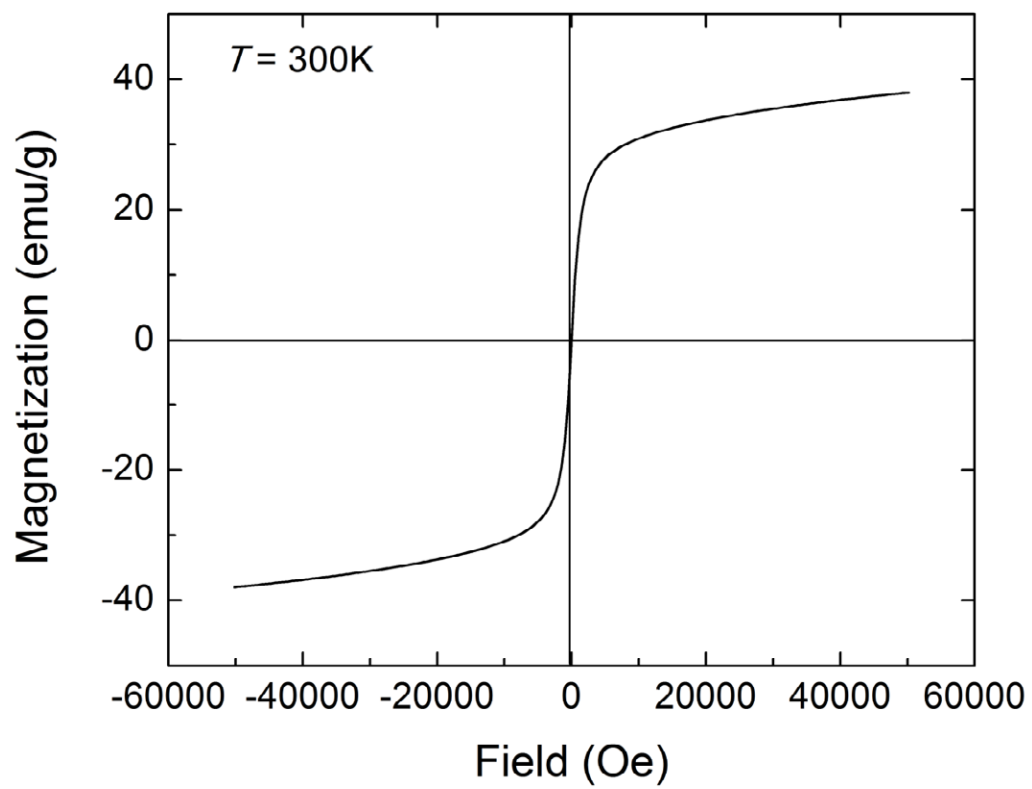

18

19 **Figure S1.** Hysteresis loops of 8 nm iron oxide NPs at 300 K.

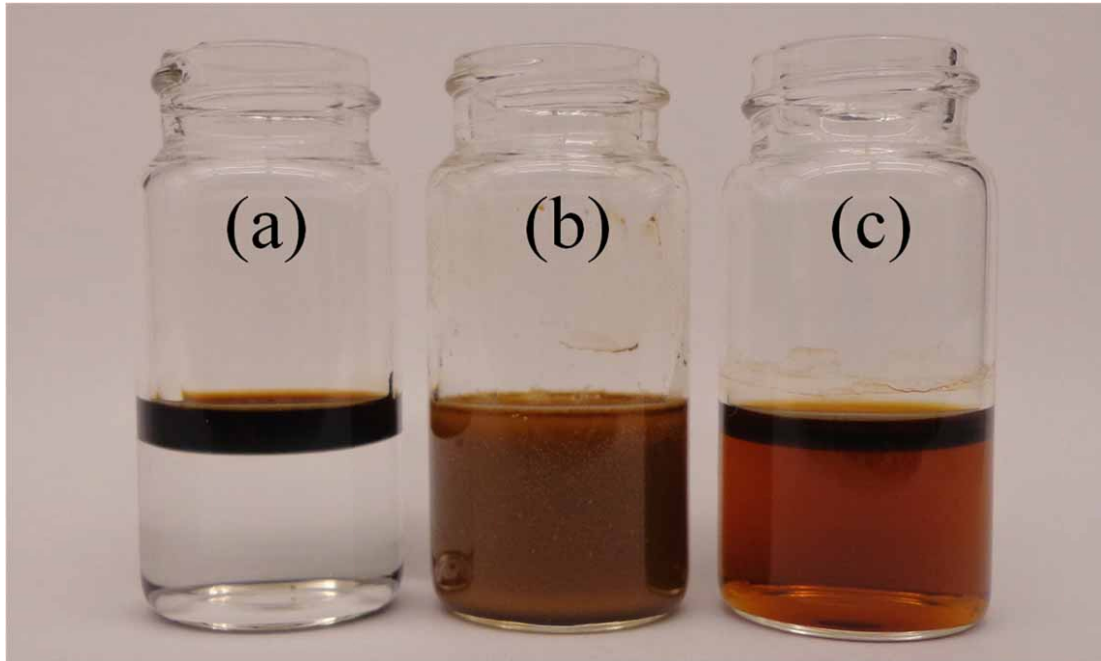

20

21 **Figure S2.** Bilayer phase transfer process at different stages: (a) at beginning, (b) just after

22 sonication and (c) after 1 day settlement.

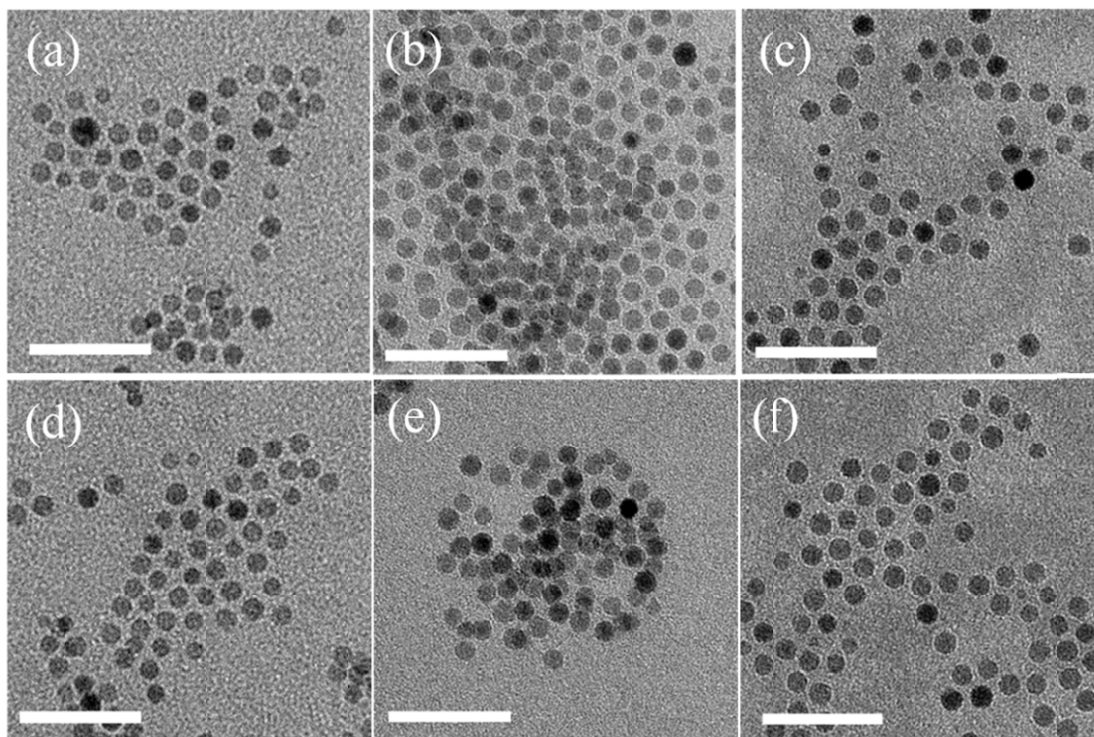

23  
24 **Figure S3.** Representative TEM micrographs of (a) RA-NPs, (b) SA-NPs, (c) SDP-NPs, (d)  
25 SDS-NPs, (e) C<sub>12</sub>TAB-NPs, and (f) EMPIGEN-NPs in water. All scale bars are 50 nm.

26 **Table S1.** Detailed hydrodynamic diameter and transfer yield as functions of sonication  
 27 amplitude, sonication time and surfactant concentration tested for ricinoleic acid (RA) coated  
 28 NPs.

| Dependent Variable | Time Tested (min)  | Conc. Tested (mM)  | Amplitude Tested   | Hydrodynamic Diameter (nm) | Transfer Yield (%) |
|--------------------|--------------------|--------------------|--------------------|----------------------------|--------------------|
| Amplitude          | 4                  | 10                 | Dependent Variable |                            |                    |
| 50%                |                    |                    |                    | 20.4 ± 6.6                 | 47.3 ± 1.3         |
| 60%                |                    |                    |                    | 23.7 ± 2.1                 | 72.0 ± 3.1         |
| 70%                |                    |                    |                    | 22.4 ± 0.5                 | 81.2 ± 2.2         |
| 80%                |                    |                    |                    | 21.3 ± 0.6                 | 84.1 ± 1.9         |
| Time (min)         | Dependent Variable | 10                 | 70%                |                            |                    |
| 2                  |                    |                    |                    | 23.6 ± 0.9                 | 53.7 ± 2.5         |
| 4                  |                    |                    |                    | 21.8 ± 1.8                 | 81.2 ± 2.2         |
| 6                  |                    |                    |                    | 20.9 ± 1.7                 | 75.9 ± 2.0         |
| 8                  |                    |                    |                    | 23.1 ± 3.3                 | 77.3 ± 1.0         |
| Conc. (mM)         | 5                  | Dependent Variable | 70%                |                            |                    |
| 2.5                |                    |                    |                    | 24.3 ± 0.7                 | 62.5 ± 1.5         |
| 5                  |                    |                    |                    | 24.2 ± 0.8                 | 78.6 ± 2.2         |
| 10                 |                    |                    |                    | 21.8 ± 1.2                 | 83.5 ± 1.6         |
| 15                 |                    |                    |                    | 21.3 ± 1.8                 | 85.1 ± 3.5         |
| 20                 |                    |                    |                    | 22.2 ± 5.5                 | 84.3 ± 1.5         |

29

30 **Table S2.** Detailed hydrodynamic diameter and transfer yield as functions of sonication  
 31 amplitude, sonication time and surfactant concentration tested for elaidic acid (EA) coated NPs.

| Dependent Variable | Time Tested (min)  | Conc. Tested (uL)  | Amplitude Tested   | Hydrodynamic Diameter (nm) | Transfer Yield (%) |
|--------------------|--------------------|--------------------|--------------------|----------------------------|--------------------|
| Amplitude          | 4                  | 50                 | Dependent Variable |                            |                    |
| 50%                |                    |                    |                    | 45.4 ± 2.9                 | 13.4 ± 1.5         |
| 60%                |                    |                    |                    | 41.2 ± 3.0                 | 19.3 ± 2.3         |
| 70%                |                    |                    |                    | 24.7 ± 5.7                 | 26.2 ± 1.1         |
| 80%                |                    |                    |                    | 22.7 ± 5.8                 | 25.7 ± 3.2         |
| Time (min)         | Dependent Variable | 50                 | 75%                |                            |                    |
| 2                  |                    |                    |                    | 31.4 ± 4.6                 | 16.5 ± 1.7         |
| 4                  |                    |                    |                    | 18.5 ± 4.3                 | 26.6 ± 2.2         |
| 6                  |                    |                    |                    | 20.5 ± 4.1                 | 25.2 ± 1.4         |
| 8                  |                    |                    |                    | 19.8 ± 2.7                 | 21.3 ± 0.5         |
| Conc. (uL)         | 6                  | Dependent Variable | 75%                |                            |                    |
| 12.5               |                    |                    |                    | 39.4 ± 10.5                | 17.7 ± 0.4         |
| 25                 |                    |                    |                    | 30.4 ± 5.2                 | 21.1 ± 1.8         |
| 50                 |                    |                    |                    | 19.5 ± 5.5                 | 25.8 ± 2.1         |
| 75                 |                    |                    |                    | 25.2 ± 4.2                 | 24.1 ± 1.4         |
| 100                |                    |                    |                    | 32.6 ± 2.7                 | 16.0 ± 0.9         |

32

33 **Table S3.** Detailed hydrodynamic diameter and transfer yield as functions of sonication  
 34 amplitude, sonication time and surfactant concentration tested for stearic acid (SA) coated NPs.

| Dependent Variable | Time Tested (min)  | Conc. Tested (mM)  | Amplitude Tested   | Hydrodynamic Diameter (nm) | Transfer Yield (%) |
|--------------------|--------------------|--------------------|--------------------|----------------------------|--------------------|
| Amplitude          | 4                  | 10                 | Dependent Variable |                            |                    |
| 50%                |                    |                    |                    | 14.9 ± 3.4                 | 41.7 ± 3.2         |
| 60%                |                    |                    |                    | 21.4 ± 2.5                 | 65.1 ± 2.0         |
| 70%                |                    |                    |                    | 18.6 ± 1.4                 | 65.2 ± 1.7         |
| 80%                |                    |                    |                    | 17.1 ± 2.1                 | 71.5 ± 3.5         |
| Time (min)         | Dependent Variable | 10                 | 70%                |                            |                    |
| 2                  |                    |                    |                    | 25.0 ± 10.4                | 47.4 ± 2.7         |
| 4                  |                    |                    |                    | 26.4 ± 8.0                 | 63.3 ± 1.6         |
| 6                  |                    |                    |                    | 23.0 ± 3.5                 | 75.4 ± 2.5         |
| Conc. (mM)         | 5                  | Dependent Variable | 70%                |                            |                    |
| 2.5                |                    |                    |                    | 17.7 ± 6.2                 | 37.4 ± 0.3         |
| 5                  |                    |                    |                    | 33.5 ± 3.8                 | 51.3 ± 2.4         |
| 10                 |                    |                    |                    | 20.8 ± 2.6                 | 73.3 ± 4.0         |

35

36 **Table S4.** Detailed hydrodynamic diameter and transfer yield as functions of sonication  
 37 amplitude, sonication time and surfactant concentration tested for palmitic acid (PA) coated NPs.

| Dependent Variable | Time Tested (min)  | Conc. Tested (mM)  | Amplitude Tested   | Hydrodynamic Diameter (nm) | Transfer Yield (%) |
|--------------------|--------------------|--------------------|--------------------|----------------------------|--------------------|
| Amplitude          | 4                  | 10                 | Dependent Variable |                            |                    |
| 50%                |                    |                    |                    | 24.7 ± 4.8                 | 35.2 ± 1.3         |
| 60%                |                    |                    |                    | 30.6 ± 2.6                 | 61.0 ± 2.4         |
| 70%                |                    |                    |                    | 26.2 ± 0.7                 | 62.7 ± 5.1         |
| 80%                |                    |                    |                    | 27.4 ± 3.3                 | 71.4 ± 3.7         |
| Time (min)         | Dependent Variable | 10                 | 65%                |                            |                    |
| 2                  |                    |                    |                    | 29.2 ± 3.5                 | 57.3 ± 2.5         |
| 4                  |                    |                    |                    | 31.9 ± 3.9                 | 63.3 ± 0.8         |
| 6                  |                    |                    |                    | 20.7 ± 7.4                 | 67.4 ± 3.1         |
| 8                  |                    |                    |                    | 23.2 ± 2.8                 | 67.2 ± 2.3         |
| Conc. (mM)         | 6                  | Dependent Variable | 65%                |                            |                    |
| 2.5                |                    |                    |                    | 31.2 ± 1.2                 | 57.1 ± 3.3         |
| 5                  |                    |                    |                    | 33.5 ± 3.7                 | 66.3 ± 3.4         |
| 10                 |                    |                    |                    | 33.2 ± 7.7                 | 68.4 ± 1.7         |
| 15                 |                    |                    |                    | 30.8 ± 1.4                 | 68.6 ± 3.2         |
| 20                 |                    |                    |                    | 23.7±11.1                  | 70.7 ± 1.9         |

38



39 **Table S5.** Detailed hydrodynamic diameter and transfer yield as functions of sonication  
 40 amplitude, sonication time and surfactant concentration tested for myristic acid (MA) coated  
 41 NPs.

| Dependent Variable | Time Tested (min)  | Conc. Tested (mM)  | Amplitude Tested   | Hydrodynamic Diameter (nm) | Transfer Yield (%) |
|--------------------|--------------------|--------------------|--------------------|----------------------------|--------------------|
| Amplitude          | 4                  | 10                 | Dependent Variable |                            |                    |
| 50%                |                    |                    |                    | 24.3 ± 7.7                 | 70.5 ± 2.3         |
| 60%                |                    |                    |                    | 24.0 ± 2.7                 | 81.0 ± 3.6         |
| 70%                |                    |                    |                    | 24.3 ± 0.3                 | 82.1 ± 3.9         |
| 80%                |                    |                    |                    | 22.8 ± 0.6                 | 80.0 ± 1.2         |
| Time (min)         | Dependent Variable | 10                 | 65%                |                            |                    |
| 1                  |                    |                    |                    | 26.7 ± 1.1                 | 73.3 ± 1.2         |
| 2                  |                    |                    |                    | 24.2 ± 1.8                 | 82.5 ± 5.6         |
| 4                  |                    |                    |                    | 21.8 ± 1.0                 | 83.9 ± 1.9         |
| 6                  |                    |                    |                    | 21.4 ± 0.3                 | 80.4 ± 2.8         |
| Conc. (mM)         | 4                  | Dependent Variable | 65%                |                            |                    |
| 2.5                |                    |                    |                    | 25.4 ± 2.8                 | 60.4 ± 2.1         |
| 5                  |                    |                    |                    | 24.2 ± 2.0                 | 67.5 ± 1.8         |
| 10                 |                    |                    |                    | 21.5 ± 1.9                 | 74.1 ± 2.3         |
| 15                 |                    |                    |                    | 20.9 ± 1.4                 | 77.3 ± 2.7         |
| 20                 |                    |                    |                    | 21.1 ± 1.1                 | 75.5 ± 4.4         |

42

43 **Table S6.** Detailed hydrodynamic diameter and transfer yield as functions of sonication  
 44 amplitude, sonication time and surfactant concentration tested for lauric acid (LA) coated NPs.

| Dependent Variable | Time Tested (min)  | Conc. Tested (mM)  | Amplitude Tested   | Hydrodynamic Diameter (nm) | Transfer Yield (%) |
|--------------------|--------------------|--------------------|--------------------|----------------------------|--------------------|
| Amplitude          | 3                  | 5                  | Dependent Variable |                            |                    |
| 50%                |                    |                    |                    | 23.2 ± 10.4                | 58.4 ± 0.8         |
| 60%                |                    |                    |                    | 25.7 ± 8.6                 | 61.5 ± 3.6         |
| 70%                |                    |                    |                    | 26.5 ± 2.1                 | 77.4 ± 5.4         |
| 80%                |                    |                    |                    | 25.6 ± 2.7                 | 84.5 ± 3.6         |
| 90%                |                    |                    |                    | 24.3 ± 0.5                 | 87.3 ± 4.1         |
| Time (min)         | Dependent Variable | 5                  | 75%                |                            |                    |
| 1                  |                    |                    |                    | 37.6 ± 4.8                 | 80.3 ± 4.1         |
| 2                  |                    |                    |                    | 31.6 ± 2.6                 | 86.5 ± 2.6         |
| 3                  |                    |                    |                    | 20.8 ± 4.0                 | 88.2 ± 3.3         |
| 4                  |                    |                    |                    | 28.0 ± 1.7                 | 84.2 ± 3.9         |
| 5                  |                    |                    |                    | 22.4 ± 9.0                 | 88.5 ± 2.6         |
| Conc. (mM)         | 3                  | Dependent Variable | 75%                |                            |                    |
| 1.25               |                    |                    |                    | 34.5 ± 0.7                 | 70.1 ± 2.8         |
| 2.5                |                    |                    |                    | 31.6 ± 2.5                 | 74.5 ± 1.7         |
| 5                  |                    |                    |                    | 26.9 ± 1.7                 | 85.1 ± 4.4         |
| 7.5                |                    |                    |                    | 25.2 ± 1.7                 | 88.8 ± 2.6         |
| 10                 |                    |                    |                    | 19.2 ± 0.4                 | 87.6 ± 1.9         |

45

46 **Table S7.** Detailed hydrodynamic diameter and transfer yield as functions of sonication  
 47 amplitude, sonication time and surfactant concentration tested for decanoic acid (DA) coated  
 48 NPs.

| Dependent Variable | Time Tested (min)  | Conc. Tested (mM)  | Amplitude Tested   | Hydrodynamic Diameter (nm) | Transfer Yield (%) |
|--------------------|--------------------|--------------------|--------------------|----------------------------|--------------------|
| Amplitude          | 4                  | 10                 | Dependent Variable |                            |                    |
| 50%                |                    |                    |                    | 24.4 ± 2.5                 | 26.7 ± 3.1         |
| 60%                |                    |                    |                    | 27.5 ± 1.5                 | 30.8 ± 5.0         |
| 70%                |                    |                    |                    | 26.1 ± 2.3                 | 40.6 ± 2.4         |
| 80%                |                    |                    |                    | 28.4 ± 0.6                 | 59.3 ± 4.2         |
| Time (min)         | Dependent Variable | 10                 | 75%                |                            |                    |
| 2                  |                    |                    |                    | 28.4 ± 0.4                 | 55.4 ± 2.0         |
| 4                  |                    |                    |                    | 26.5 ± 0.6                 | 54.3 ± 2.4         |
| 6                  |                    |                    |                    | 25.1 ± 0.7                 | 55.0 ± 1.8         |
| 8                  |                    |                    |                    | 25.4 ± 0.8                 | 59.3 ± 3.6         |
| Conc. (mM)         | 4                  | Dependent Variable | 75%                |                            |                    |
| 2.5                |                    |                    |                    | 30.4 ± 8.9                 | 38.4 ± 0.7         |
| 5                  |                    |                    |                    | 28.9 ± 0.7                 | 40.4 ± 2.1         |
| 10                 |                    |                    |                    | 28.5 ± 0.6                 | 46.4 ± 1.1         |
| 15                 |                    |                    |                    | 27.4 ± 1.9                 | 45.6 ± 1.6         |
| 20                 |                    |                    |                    | 28.9 ± 0.3                 | 53.4 ± 3.0         |

49

50 **Table S8.** Detailed hydrodynamic diameter and transfer yield as functions of sonication  
 51 amplitude, sonication time and surfactant concentration tested for sodium monododecyl  
 52 phosphate (SDP) coated NPs.

| Dependent Variable | Time Tested (min)  | Conc. Tested (mM)  | Amplitude Tested   | Hydrodynamic Diameter (nm) | Transfer Yield (%) |
|--------------------|--------------------|--------------------|--------------------|----------------------------|--------------------|
| Amplitude          | 3                  | 5                  | Dependent Variable |                            |                    |
| 50%                |                    |                    |                    | 44.5 ± 0.5                 | 51.2 ± 3.4         |
| 60%                |                    |                    |                    | 41.6 ± 2.4                 | 67.4 ± 3.9         |
| 70%                |                    |                    |                    | 39.1 ± 2.9                 | 85.6 ± 4.6         |
| 80%                |                    |                    |                    | 36.2 ± 0.6                 | 93.1 ± 4.9         |
| 90%                |                    |                    |                    | 39.0 ± 1.0                 | 91.4 ± 5.5         |
| Time (min)         | Dependent Variable | 5                  | 70%                |                            |                    |
| 1                  |                    |                    |                    | 53.2 ± 3.2                 | 67.4 ± 1.3         |
| 2                  |                    |                    |                    | 43.7 ± 1.6                 | 79.3 ± 5.7         |
| 3                  |                    |                    |                    | 38.7 ± 0.8                 | 90.9 ± 4.7         |
| 4                  |                    |                    |                    | 39.0 ± 1.0                 | 92.7 ± 3.2         |
| 5                  |                    |                    |                    | 38.4 ± 2.5                 | 95.2 ± 1.9         |
| Conc. (mM)         | 3                  | Dependent Variable | 70%                |                            |                    |
| 1.25               |                    |                    |                    | 54.9 ± 3.3                 | 66.9 ± 1.1         |
| 2.5                |                    |                    |                    | 43.1 ± 2.3                 | 77.3 ± 2.2         |
| 5                  |                    |                    |                    | 40.6 ± 1.2                 | 87.6 ± 3.9         |
| 7.5                |                    |                    |                    | 34.3 ± 0.2                 | 85.2 ± 6.7         |
| 10                 |                    |                    |                    | 23.4 ± 3.5                 | 90.1 ± 2.3         |

53

54 **Table S9.** Detailed hydrodynamic diameter and transfer yield as functions of sonication  
 55 amplitude, sonication time and surfactant concentration tested for sodium monododecyl sulfate  
 56 (SDS) coated NPs.

| Dependent Variable | Time Tested (min)  | Conc. Tested (mM)  | Amplitude Tested   | Hydrodynamic Diameter (nm) | Transfer Yield (%) |
|--------------------|--------------------|--------------------|--------------------|----------------------------|--------------------|
| Amplitude          | 5                  | 5                  | Dependent Variable |                            |                    |
| 50%                |                    |                    |                    | 20.9 ± 3.0                 | 40.8 ± 0.6         |
| 60%                |                    |                    |                    | 20.4 ± 1.1                 | 50.4 ± 1.2         |
| 70%                |                    |                    |                    | 19.0 ± 1.0                 | 64.3 ± 3.6         |
| 80%                |                    |                    |                    | 20.2 ± 1.6                 | 72.3 ± 7.4         |
| 90%                |                    |                    |                    | 20.3 ± 0.1                 | 70.7 ± 0.9         |
| Time (min)         | Dependent Variable | 5                  | 70%                |                            |                    |
| 1                  |                    |                    |                    | 22.6 ± 10.4                | 55.2 ± 2.0         |
| 2                  |                    |                    |                    | 20.9 ± 2.6                 | 59.7 ± 1.0         |
| 3                  |                    |                    |                    | 21.9 ± 0.2                 | 73.6 ± 4.0         |
| 4                  |                    |                    |                    | 22.1 ± 1.3                 | 79.1 ± 0.7         |
| 5                  |                    |                    |                    | 22.2 ± 1.5                 | 74.1 ± 1.8         |
| Conc. (mM)         | 3                  | Dependent Variable | 70%                |                            |                    |
| 1.0                |                    |                    |                    | 28.1 ± 1.0                 | 57.5 ± 2.7         |
| 2.5                |                    |                    |                    | 25.0 ± 0.5                 | 76.2 ± 2.1         |
| 5                  |                    |                    |                    | 20.6 ± 0.7                 | 75.9 ± 3.2         |
| 7.5                |                    |                    |                    | 19.7 ± 0.3                 | 78.2 ± 3.1         |
| 10                 |                    |                    |                    | 16.6 ± 0.7                 | 76.0 ± 1.8         |

57

58 **Table S10.** Detailed hydrodynamic diameter and transfer yield as functions of sonication  
 59 amplitude, sonication time and surfactant concentration tested for sodium  
 60 dodecylbenzenesulfonate (SDBS) coated NPs.

| Dependent Variable | Time Tested (min)  | Conc. Tested (mM)  | Amplitude Tested   | Hydrodynamic Diameter (nm) | Transfer Yield (%) |
|--------------------|--------------------|--------------------|--------------------|----------------------------|--------------------|
| Amplitude          | 4                  | 10                 | Dependent Variable |                            |                    |
| 50%                |                    |                    |                    | 16.4 ± 3.1                 | 36.3 ± 0.7         |
| 60%                |                    |                    |                    | 15.0 ± 0.6                 | 58.4 ± 2.2         |
| 70%                |                    |                    |                    | 17.1 ± 1.5                 | 63.3 ± 0.4         |
| 80%                |                    |                    |                    | 16.2 ± 1.9                 | 66.6 ± 1.7         |
| Time (min)         | Dependent Variable | 10                 | 70%                |                            |                    |
| 2                  |                    |                    |                    | 21.0 ± 2.7                 | 53.0 ± 1.7         |
| 4                  |                    |                    |                    | 16.6 ± 1.9                 | 67.5 ± 1.6         |
| 6                  |                    |                    |                    | 15.1 ± 3.0                 | 68.4 ± 1.6         |
| Conc. (mM)         | 5                  | Dependent Variable | 70%                |                            |                    |
| 5                  |                    |                    |                    | 18.9 ± 0.3                 | 45.5 ± 1.4         |
| 10                 |                    |                    |                    | 17.2 ± 0.8                 | 62.8 ± 1.0         |
| 20                 |                    |                    |                    | 15.2 ± 4.1                 | 66.1 ± 1.4         |
| 30                 |                    |                    |                    | 18.2 ± 3.4                 | 64.9 ± 5.5         |
| 40                 |                    |                    |                    | 17.9 ± 0.3                 | 64.5 ± 2.3         |

61

62 **Table S11.** Detailed hydrodynamic diameter and transfer yield as functions of sonication  
 63 amplitude, sonication time and surfactant concentration tested for dodecyltrimethylammonium  
 64 bromide (C<sub>12</sub>TAB) coated NPs.

| Dependent Variable | Time Tested (min)  | Conc. Tested (mM)  | Amplitude Tested   | Hydrodynamic Diameter (nm) | Transfer Yield (%) |
|--------------------|--------------------|--------------------|--------------------|----------------------------|--------------------|
| Amplitude          | 4                  | 10                 | Dependent Variable |                            |                    |
| 50%                |                    |                    |                    | 22.3 ± 4.1                 | 28.7 ± 3.4         |
| 60%                |                    |                    |                    | 19.7 ± 1.7                 | 33.8 ± 2.2         |
| 70%                |                    |                    |                    | 21.3 ± 1.3                 | 35.5 ± 5.2         |
| 80%                |                    |                    |                    | 21.5 ± 0.8                 | 42.8 ± 2.3         |
| Time (min)         | Dependent Variable | 10                 | 75%                |                            |                    |
| 2                  |                    |                    |                    | 19.6 ± 1.0                 | 38.5 ± 0.7         |
| 4                  |                    |                    |                    | 20.7 ± 1.0                 | 45.1 ± 1.9         |
| 6                  |                    |                    |                    | 20.3 ± 2.3                 | 47.4 ± 1.4         |
| Conc. (mM)         | 4                  | Dependent Variable | 75%                |                            |                    |
| 5                  |                    |                    |                    | 34.5 ± 0.4                 | 30.2 ± 2.9         |
| 10                 |                    |                    |                    | 20.7 ± 1.0                 | 44.6 ± 1.6         |
| 20                 |                    |                    |                    | 36.1 ± 0.6                 | 41.1 ± 3.5         |
| 30                 |                    |                    |                    | 43.8 ± 11.5                | 42.6 ± 2.2         |
| 40                 |                    |                    |                    | 59.2 ± 3.4                 | 40.4 ± 4.5         |

65

66 **Table S12.** Detailed hydrodynamic diameter and transfer yield as functions of sonication  
 67 amplitude, sonication time and surfactant concentration tested for N,N-Dimethyl-N-  
 68 dodecylglycine betaine (EMPIGEN) coated NPs.

69

| Dependent Variable | Time Tested (min)  | Conc. Tested (mM)  | Amplitude Tested   | Hydrodynamic Diameter (nm) | Transfer Yield (%) |
|--------------------|--------------------|--------------------|--------------------|----------------------------|--------------------|
| Amplitude          | 5                  | 20                 | Dependent Variable |                            |                    |
| 50%                |                    |                    |                    | 29.0 ± 9.8                 | 30.2 ± 2.7         |
| 60%                |                    |                    |                    | 36.9 ± 8.1                 | 38.4 ± 1.2         |
| 70%                |                    |                    |                    | 36.0 ± 6.9                 | 42.3 ± 3.3         |
| 80%                |                    |                    |                    | 33.1 ± 13.7                | 46.3 ± 4.5         |
| 90%                |                    |                    |                    | 38.3 ± 1.9                 | 46.1 ± 2.3         |
| Time (min)         | Dependent Variable | 20                 | 70%                |                            |                    |
| 2                  |                    |                    |                    | 36.1 ± 0.9                 | 46.4 ± 3.5         |
| 4                  |                    |                    |                    | 33.8 ± 9.9                 | 42.4 ± 1.2         |
| 5                  |                    |                    |                    | 30.8 ± 7.4                 | 50.5 ± 2.3         |
| 6                  |                    |                    |                    | 30.0 ± 0.9                 | 55.8 ± 3.6         |
| 8                  |                    |                    |                    | 32.1 ± 0.7                 | 52.8 ± 2.8         |
| Conc. (mM)         | 6                  | Dependent Variable | 70%                |                            |                    |
| 10                 |                    |                    |                    | 56.8 ± 6.6                 | 37.1 ± 1.3         |
| 20                 |                    |                    |                    | 31.5 ± 2.9                 | 46.4 ± 2.6         |
| 30                 |                    |                    |                    | 27.9 ± 3.5                 | 54.9 ± 1.9         |
| 40                 |                    |                    |                    | 17.3 ± 1.5                 | 65.4 ± 4.3         |
| 50                 |                    |                    |                    | 21.6 ± 1.0                 | 67.9 ± 3.1         |



70 **Table S13.** Total organic carbon (TOC) concentrations of bilayer coated iron oxide NPs (50  
 71 ppm Fe).

| Outer layer          | TOC (ppm)   | Outer layer density (mol/mol Fe <sub>3</sub> O <sub>4</sub> ) <sup>a</sup> | Outer layer density (mol/mol # NPs) <sup>a</sup> | Out layer density (10 <sup>-5</sup> mol/m <sup>2</sup> ) <sup>a</sup> |
|----------------------|-------------|----------------------------------------------------------------------------|--------------------------------------------------|-----------------------------------------------------------------------|
| Oleic acid (OA)      | 102.8 ± 0.3 | 1.32                                                                       | 4953                                             | 3.99                                                                  |
| Ricinoleic acid (RA) | 100.1 ± 0.9 | 1.28                                                                       | 4792                                             | 3.86                                                                  |
| Elaidic acid (EA)    | 85.0 ± 0.2  | 1.04                                                                       | 3917                                             | 3.16                                                                  |
| Stearic acid (SA)    | 99.8 ± 0.9  | 1.27                                                                       | 4777                                             | 3.85                                                                  |
| Palmitic acid (PA)   | 99.4 ± 0.2  | 1.43                                                                       | 5350                                             | 4.31                                                                  |
| Myristic acid (MA)   | 94.3 ± 0.5  | 1.53                                                                       | 5730                                             | 4.62                                                                  |
| Lauric acid (LA)     | 87.2 ± 0.5  | 1.62                                                                       | 6063                                             | 4.89                                                                  |
| Decanoic acid (DA)   | 81.3 ± 0.3  | 1.77                                                                       | 6655                                             | 5.36                                                                  |
| SDP                  | 86.7 ± 0.5  | 1.60                                                                       | 6016                                             | 4.85                                                                  |
| SDS                  | 88.8 ± 0.4  | 1.65                                                                       | 6207                                             | 5.00                                                                  |
| SDBS                 | 100.5 ± 1.9 | 1.28                                                                       | 4814                                             | 3.88                                                                  |
| C <sub>12</sub> TAB  | 95.0 ± 0.1  | 1.44                                                                       | 5395                                             | 4.35                                                                  |
| EMPIGEN              | 98.3 ± 1.6  | 1.41                                                                       | 5276                                             | 4.25                                                                  |

72 <sup>a</sup> Assumes the surface area per oleic acid molecule (*A*) to be 0.2 nm<sup>2</sup>,<sup>1</sup> the radius of IONPs (*r*)  
 73 to be 8.1/2=4.05 nm, the density of iron oxide ( $\rho$ ) is 5.17 g/cm<sup>3</sup>. The base oleic acid layer is  
 74 calculated to be 23.2 mg per 50 mg Fe, which is equal to 0.28 mmol oleic acid/mmol Fe<sub>3</sub>O<sub>4</sub>.

$$\begin{aligned}
75 \quad \text{Base OA layer} &= \frac{(\text{base OA layer weight on each NP}) * \text{Fe concentration}}{\text{each NP weight (as Fe)}} = \\
76 \quad &\frac{(\# \text{ of OA molecule on each NP}) * (\text{molecular weight of OA}) / N_A}{(\text{volume of each NP}) * (\text{density of iron oxide}) * (\text{percentage of Fe in each NP})} \text{Fe concentration} = \\
77 \quad &\frac{(4\pi r^2 / A) * (M_w \text{ of OA}) / N_A}{(4\pi r^3 / 3) * \rho_{Fe_3O_4} * (3 * M_w \text{ of Fe} / M_w \text{ of Fe}_3O_4)} \text{Fe concentration} \quad (1)
\end{aligned}$$

$$78 \quad \text{The C content in the base OA layer} = \frac{18 * (M_w \text{ of C})}{M_w \text{ of OA}} \text{base OA layer content} \quad (2)$$

79 The C concentration in the base OA layer was calculated to be 17.74 mg per 50 mg Fe. By  
80 subtracting the C concentration from the total carbon concentration, we can derive the C  
81 concentration in the second layer and thus the mol concentration of second layer.

$$82 \quad \text{The mol concentration of } Fe_3O_4 = \frac{\text{Fe concentration}}{3 * (M_w \text{ of Fe})} = 0.298 \text{ mmol as in 50 ppm Fe} \quad (3)$$

$$83 \quad \text{Outer layer density} \left( \frac{\text{mol}}{\text{mol } Fe_3O_4} \right) = \frac{\text{mol concentration of second layer}}{\text{mol concentration of } Fe_3O_4} \quad (4)$$

$$84 \quad \text{Outer layer density} \left( \frac{\text{mol}}{\text{mol \# NPs}} \right) = \frac{\text{mol concentration of second layer}}{\text{mol \# NPs}} =$$

$$85 \quad \frac{\text{mol concentration of second layer}}{(\text{total weight as } Fe_3O_4 / \text{each NP weight} * N_A)} \quad (5)$$

$$86 \quad \text{Outer layer density} \left( \frac{\text{mol}}{m^2} \right) = \frac{\text{mol concentration of second layer}}{\text{mol \# NPs}} =$$

$$87 \quad \frac{\text{mol concentration of second layer}}{(\text{surface area of each NP}) * (\text{total weight as } Fe_3O_4) / (\text{each NP weight})} \quad (6)$$

88 **Table S14.** Summary of CCC values for bilayer coated iron oxide NPs.

| Outer layer          | Critical Coagulation Concentration |                        |
|----------------------|------------------------------------|------------------------|
|                      | NaCl (mM)                          | CaCl <sub>2</sub> (mM) |
| Oleic acid (OA)      | 710                                | 10.6                   |
| Ricinoleic acid (RA) | 746                                | 10.8                   |
| Elaidic acid (EA)    | 260                                | 7.4                    |
| Stearic acid (SA)    | 452                                | 9.3                    |
| Palmitic acid (PA)   | 257                                | 5.3                    |
| Myristic acid (MA)   | 94                                 | 3.9                    |
| Lauric acid (LA)     | 16                                 | 0.5                    |
| Decanoic acid (DA)   | 27                                 | 1.6                    |
| SDP                  | 250                                | 3.6                    |
| SDS                  | 45                                 | 1.4                    |
| SDBS                 | 46                                 | 6.0                    |
| C <sub>12</sub> TAB  | 555                                | 11.1                   |
| EMPIGEN              | 766                                | 11.3                   |

89

90 **References**

- 91 1. A. G. Roca, M. P. Morales, K. O'Grady and C. J. Serna, *Nanotechnology*, 2006, **17**,  
92 2783.
